# Supplementary material for: Chemo-enzymatic synthesis of 11-hydroxyundecanoic acid and 1,11-undecanedioic acid from ricinoleic acid
Source: Royal Society of Chemistry journal article supplement (doi:10.1039/c5gc01017a), 2015-09-15
Supplement: c5gc01017a1.pdf [file c5gc01017a1.pdf]

Electronic Supplementary Information (ESI)

**Chemo-Enzymatic Synthesis of 11-Hydroxyundecanoic Acid and 1,11-Undecanedioic Acid from Ricinoleic Acid**

Hyun-Young Jang<sup>1,†</sup>, Kaushik Singha<sup>2,†</sup>, Hwan-Hee Kim<sup>1</sup>, Yong-Uk Kwon<sup>2,\*</sup>, and Jin-Byung Park<sup>1,\*</sup>

<sup>1</sup>Department of Food Science and Engineering, Ewha Womans University, Seoul 120-750, Republic of Korea

<sup>2</sup>Department of Chemistry and Nano Science, Ewha Womans University, Seoul 120-750, Republic of Korea

\*To whom correspondence should be addressed. E-mail: yukwon@ewha.ac.kr (Y.-U. Kwon), jbpark06@ewha.ac.kr (J.-B. Park), Tel: +82-2-3277-6685/4509, Fax: +82-2-3277-4213

<sup>†</sup>H.-Y. Jang and K. Singha contributed equally to this work.

**Table of Contents**

|                                                                                                                        |       |    |
|------------------------------------------------------------------------------------------------------------------------|-------|----|
| <b>Fig. S1</b> <sup>1</sup> H and <sup>13</sup> C NMR spectra of (Z)-11-(heptanoyloxy)undec-9-enoic acid ( <b>3</b> )  | ----- | S2 |
| <b>Fig. S2</b> <sup>1</sup> H and <sup>13</sup> C NMR spectra of 11-(heptanoyloxy)undecanoic acid ( <b>6</b> )         | ----- | S3 |
| <b>Fig. S3</b> <sup>1</sup> H and <sup>13</sup> C NMR spectra of 11-hydroxyundecanoic acid ( <b>7</b> )                | ----- | S4 |
| <b>Fig. S4</b> <sup>1</sup> H and <sup>13</sup> C NMR spectra of undecanedioic acid ( <b>8</b> )                       | ----- | S5 |
| <b>Fig. S5</b> Effect of heptanoic acid and ester ( <b>3</b> ) concentration on specific growth rate of <i>E. coli</i> |       | S6 |



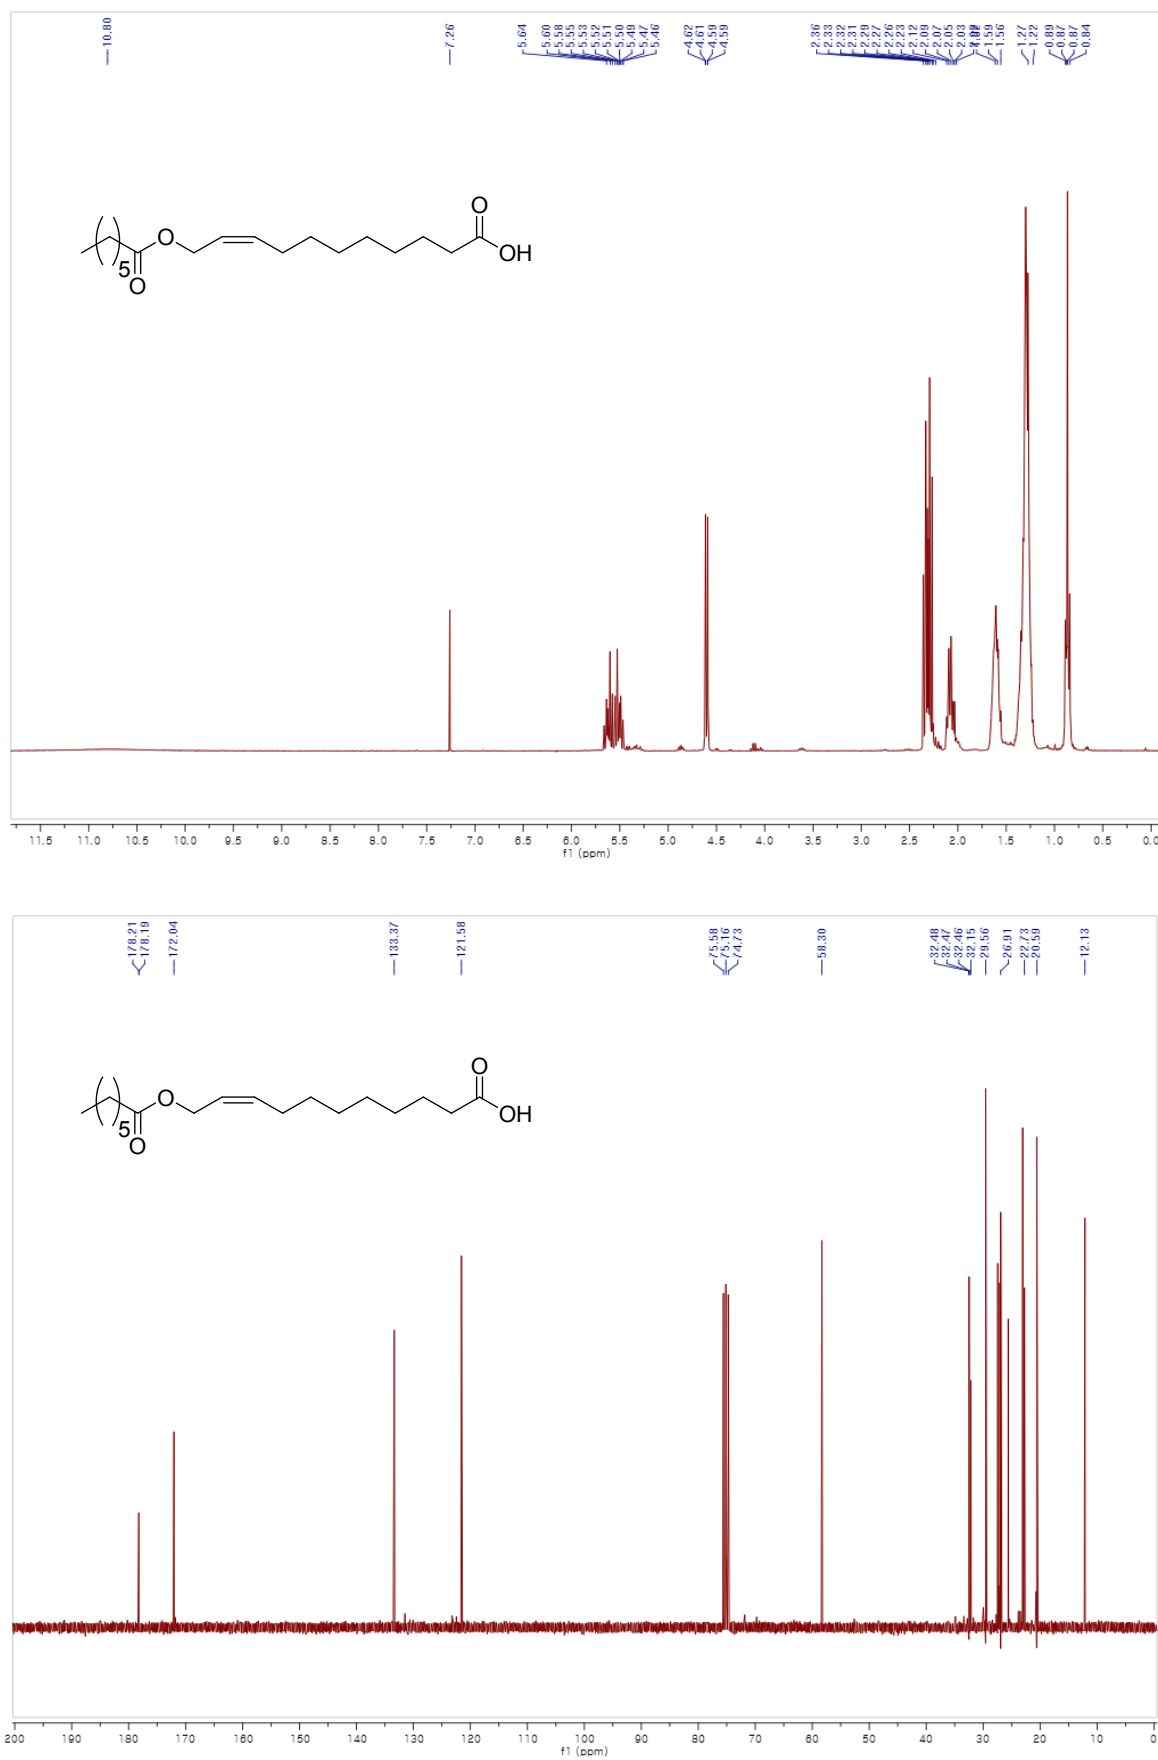

**Fig. S1** <sup>1</sup>H and <sup>13</sup>C (in CDCl<sub>3</sub>) NMR spectra of (Z)-11-(heptanoyloxy)undec-9-enoic acid (**3**).

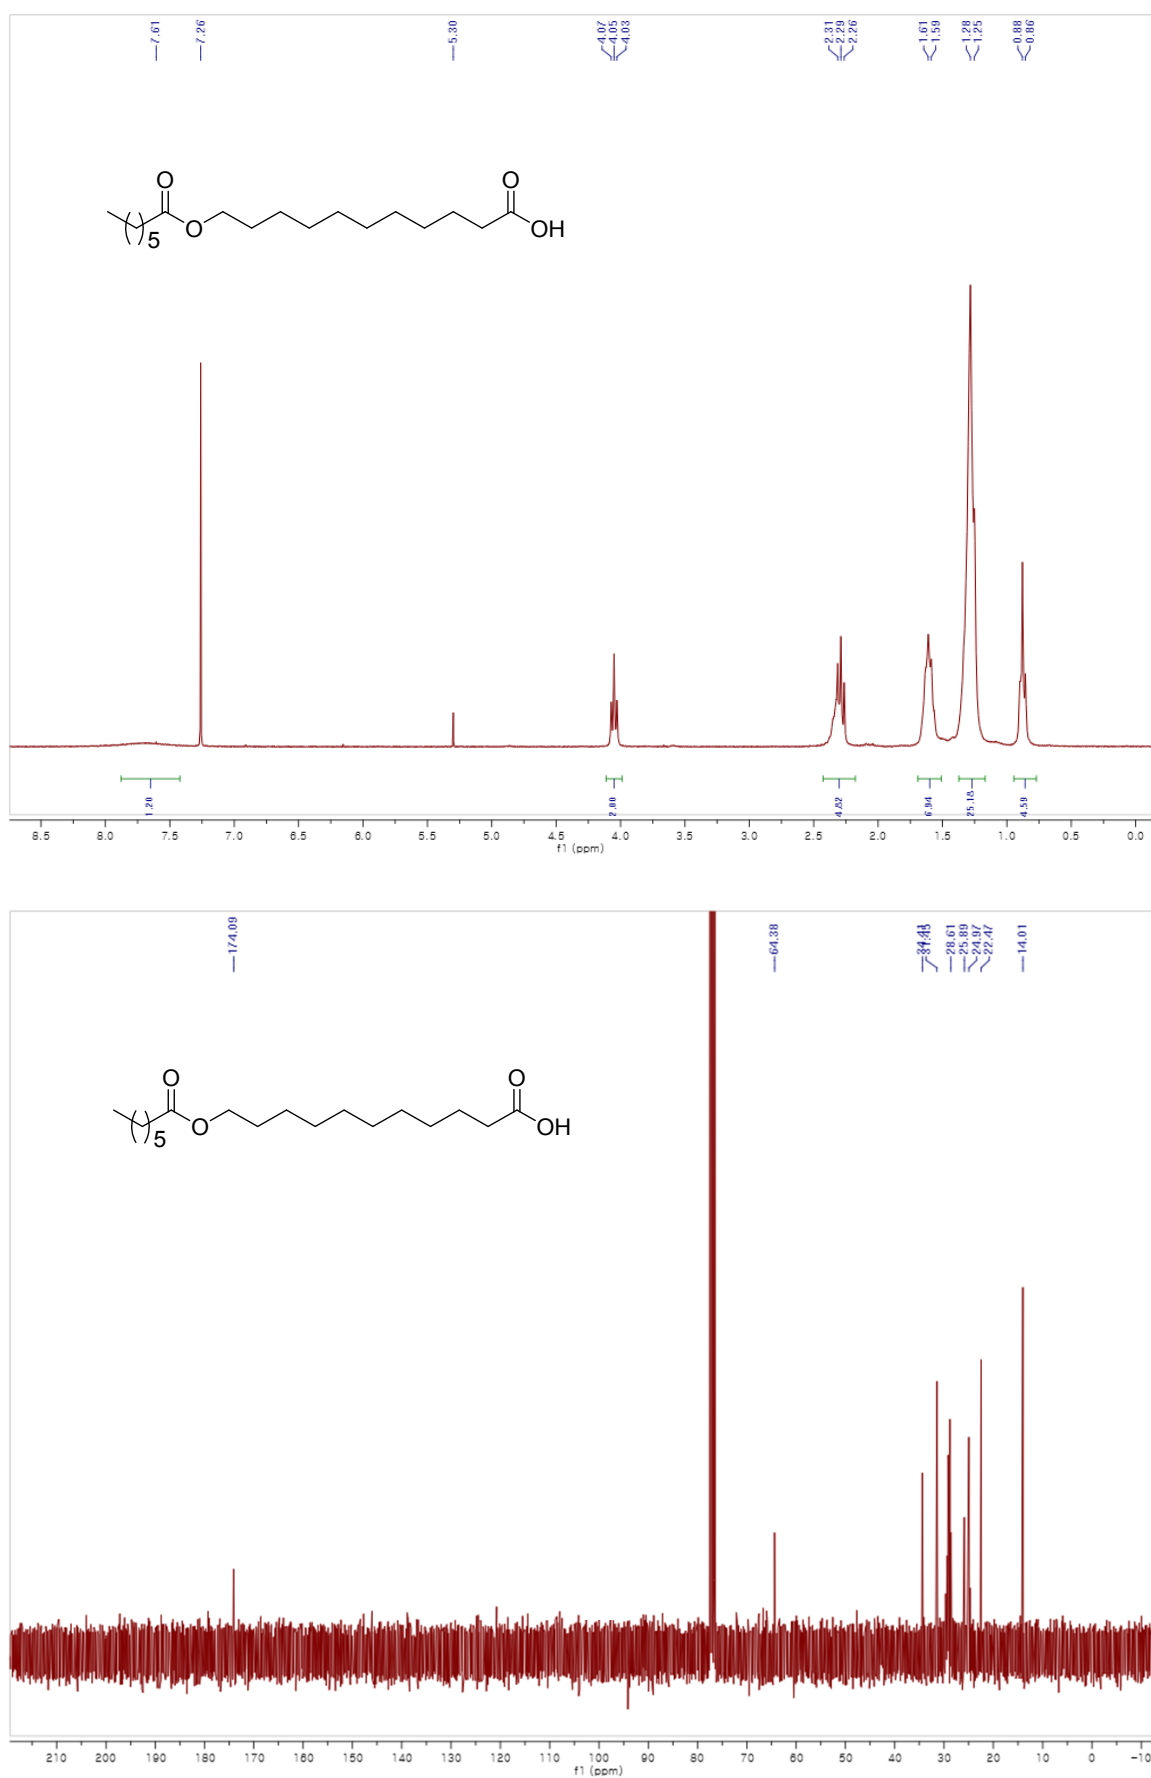

**Fig. S2** <sup>1</sup>H and <sup>13</sup>C (in CDCl<sub>3</sub>) NMR spectra of 11-(heptanoyloxy)undecanoic acid (**6**).

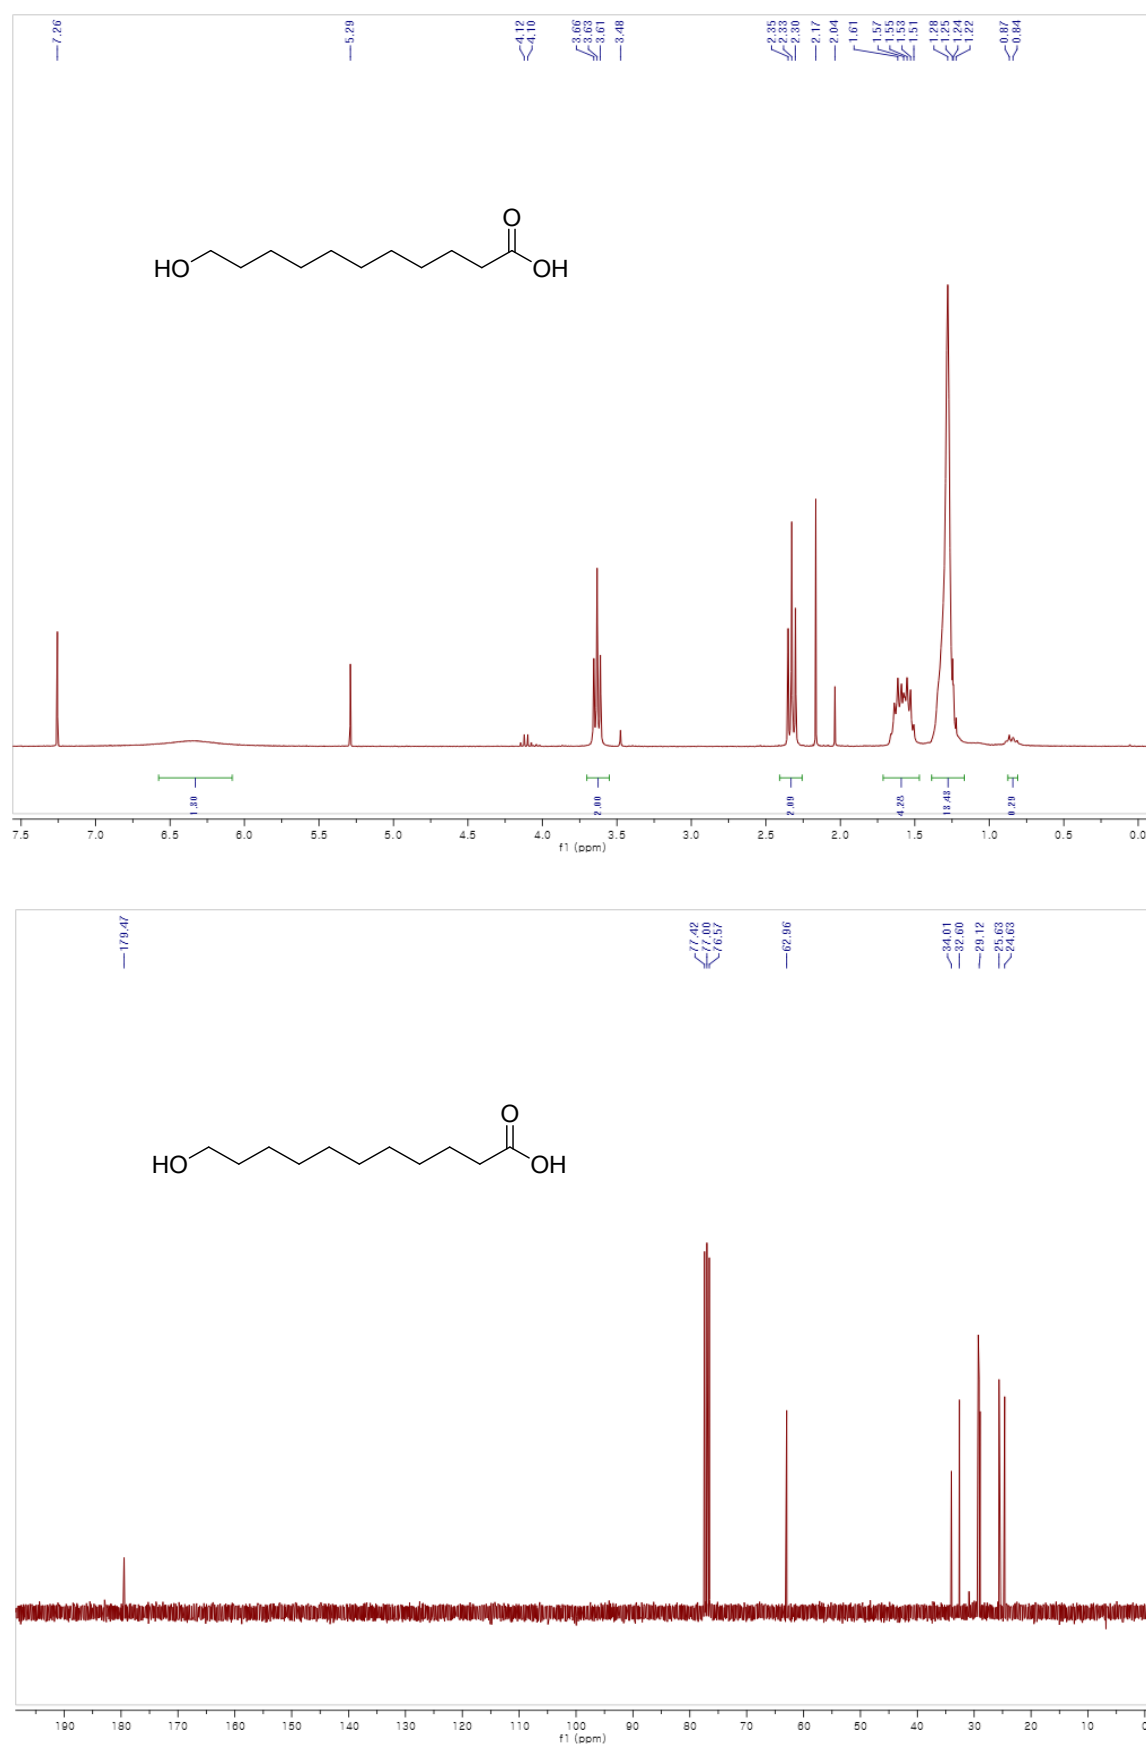

**Fig. S3** <sup>1</sup>H and <sup>13</sup>C (in CDCl<sub>3</sub>) NMR spectra of 11-hydroxyundecanoic acid (7).

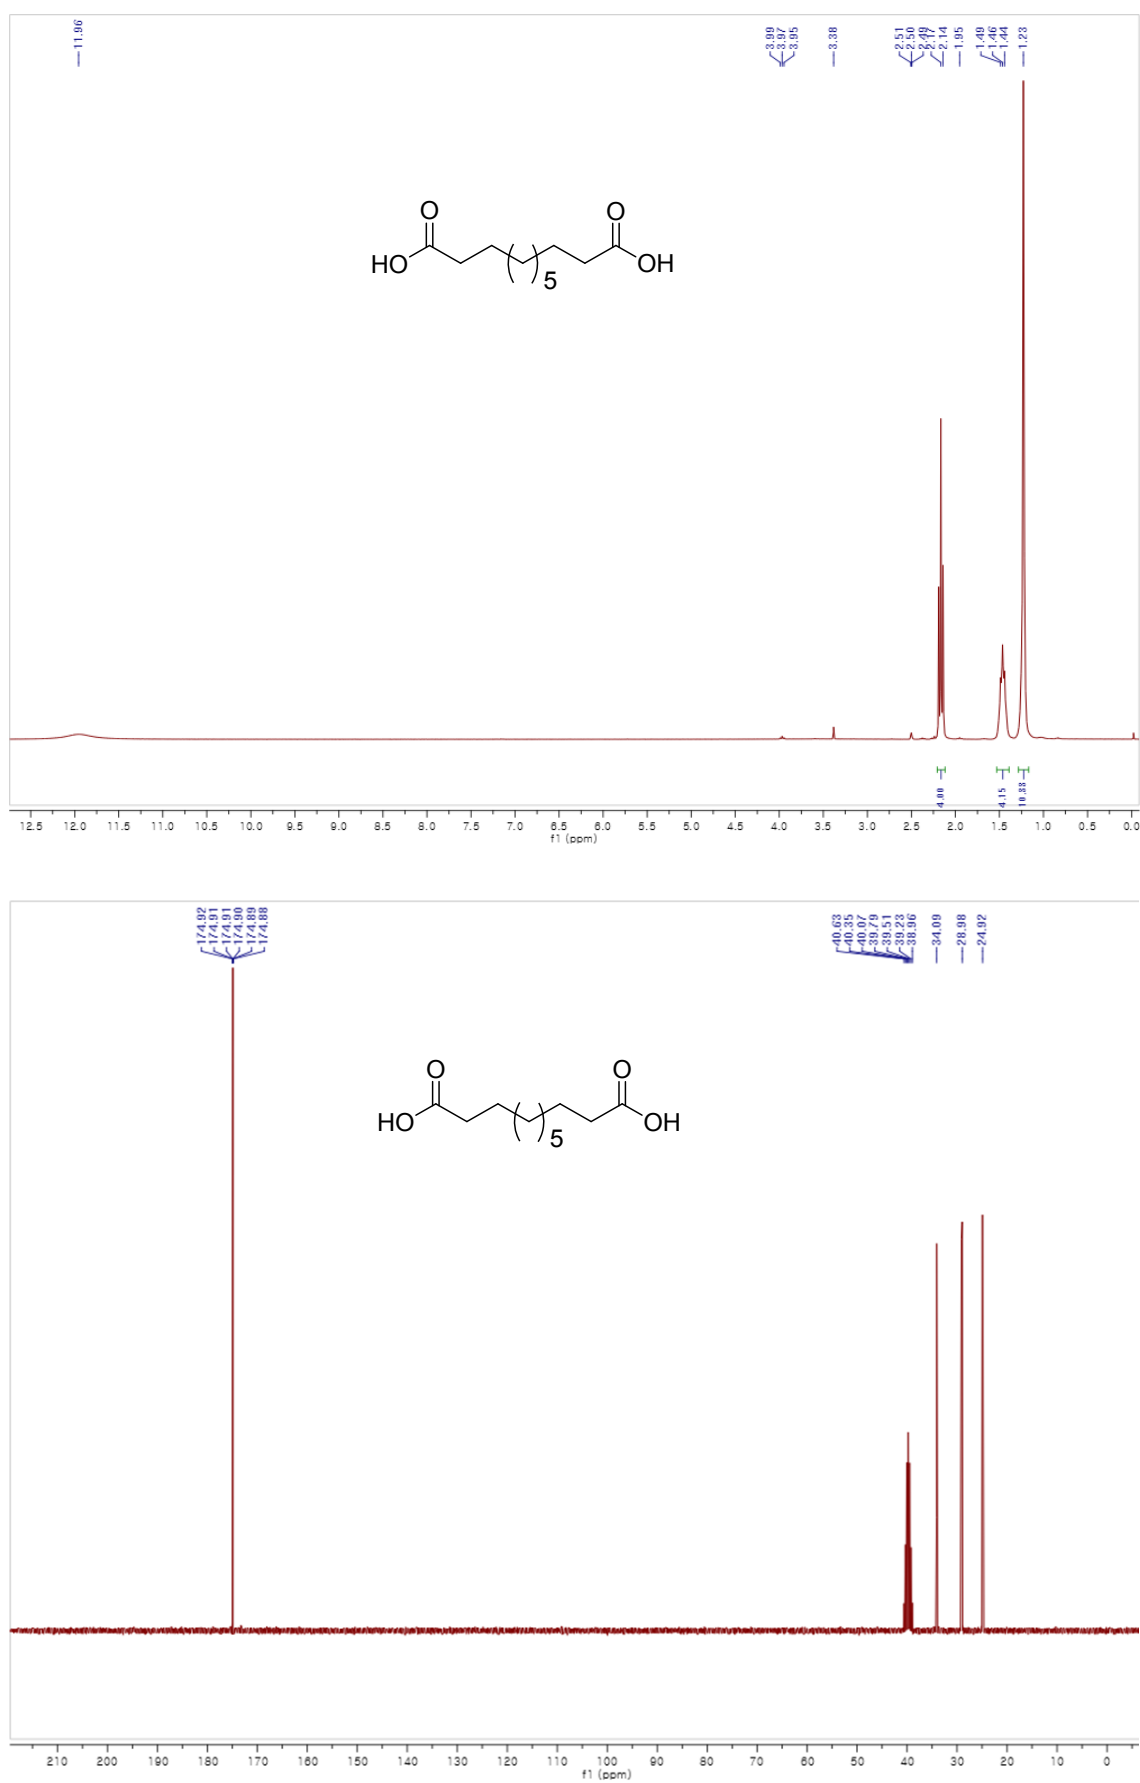

**Fig. S4**  $^1\text{H}$  and  $^{13}\text{C}$  (in  $\text{DMSO-}d_6$ ) NMR spectra of undecanedioic acid (**8**).

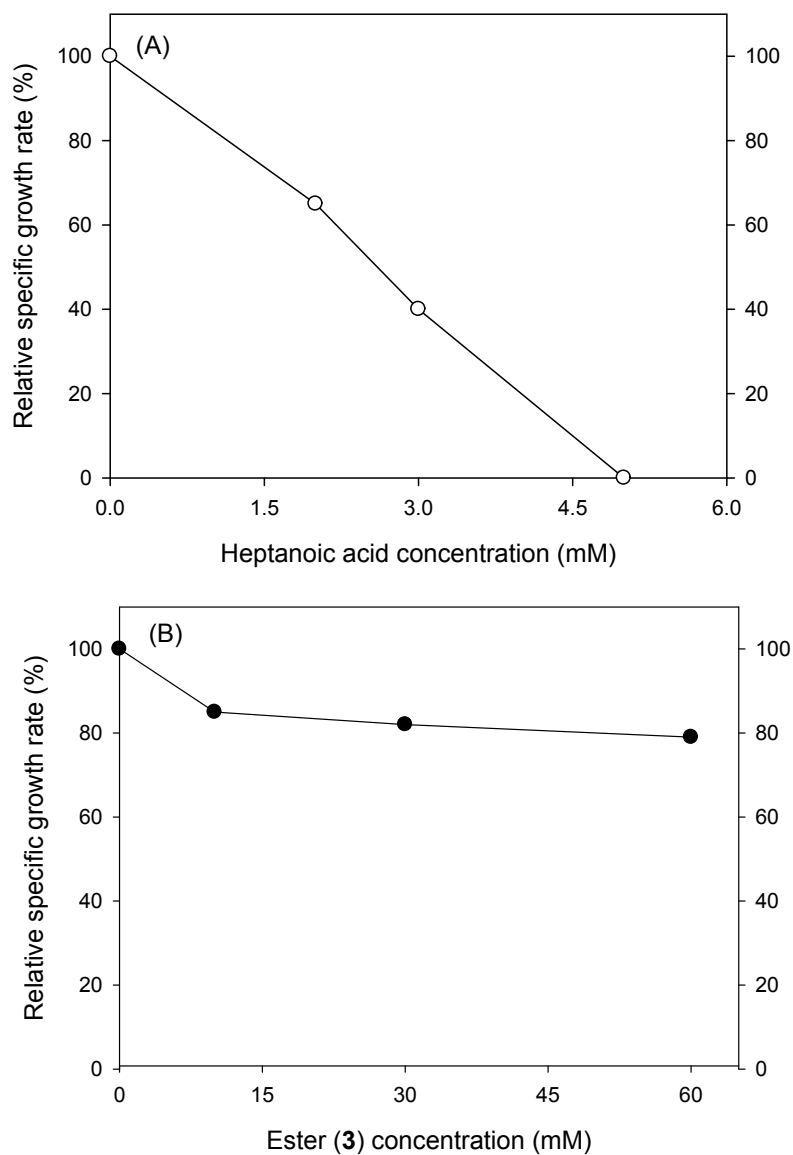

**Fig. S5** Effect of heptanoic acid (A) and ester (**3**) concentration (B) on specific growth rate of *E. coli*. 100% indicates the specific growth rate of  $0.65 \text{ h}^{-1}$ . When the *E. coli* BL21 cultures (100 mL) reached the early exponential growth phase, they were split into 20-mL subcultures, to which different concentrations of heptanoic acid (A) or ester (**3**) (B) were added.
